# Supplementary material for: Green Manuring Enhances Soil Multifunctionality in Tobacco Field in Southwest China
Source: MDPI journal article supplement (doi:10.3390/microorganisms12050949), 2024-05-07
Supplement: s1 [file s1]

## Supplementary Material for

This file includes:

1. Supplementary Figures S1 to S6
2. Supplementary Tables S1 to S5

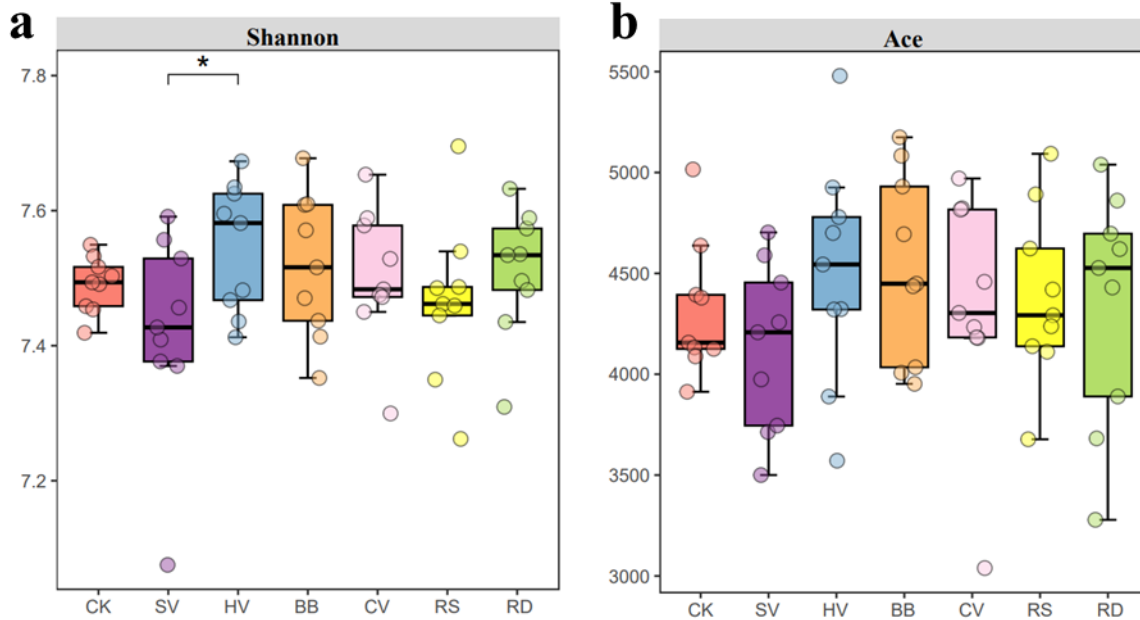

**Figure S1.** Shannon (a) index and ACE (b) index analysis of bacterial communities in rhizosphere soil. CK—winter fallow control; SV—returning smooth vetch; HV—returning hairy vetch; BB—returning broad bean; CV—returning common vetch; RS—returning rapeseed; RD—returning radish. Different lowercase letters at the tops of boxes indicate significant differences among treatments at the same stage ( $P < 0.05$ ).

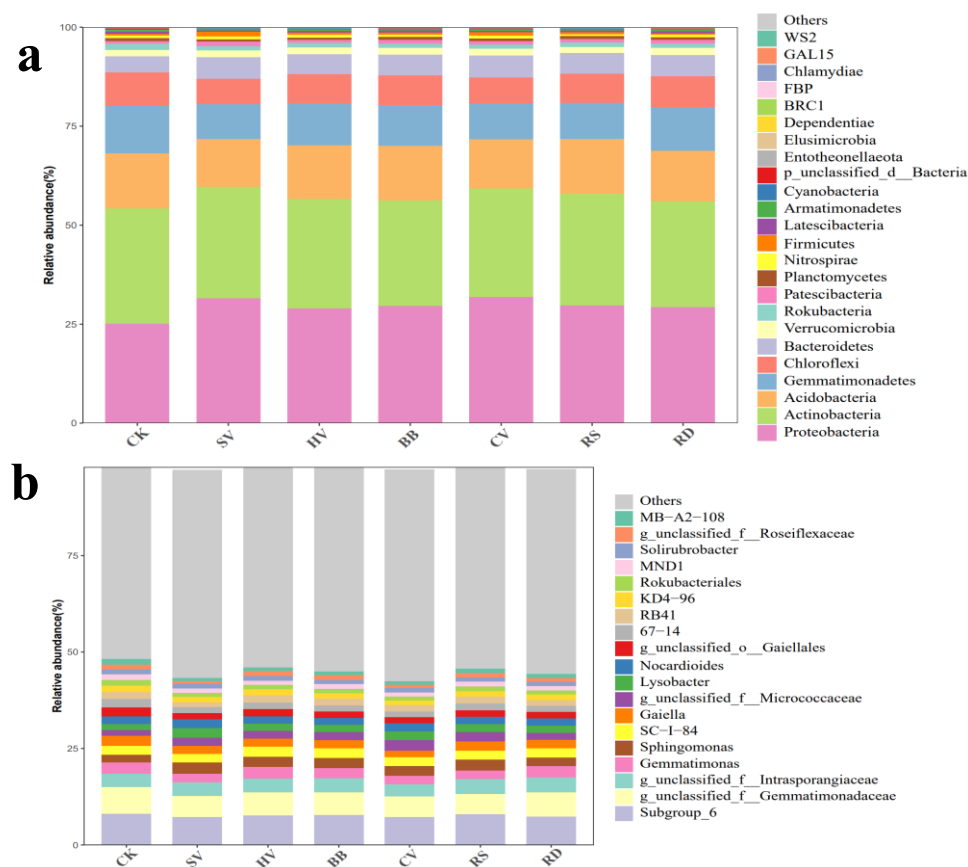

**Figure S2** Composition of soil bacterial community at phylum (a) and genus (b) level. CK—winter fallow control; SV—returning smooth vetch; HV—returning hairy vetch; BB—returning broad bean; CV—returning common vetch; RS—returning rapeseed; RD—returning radish. Different lowercase letters at the tops of boxes indicate significant differences among treatments at the same stage ( $P < 0.05$ ).

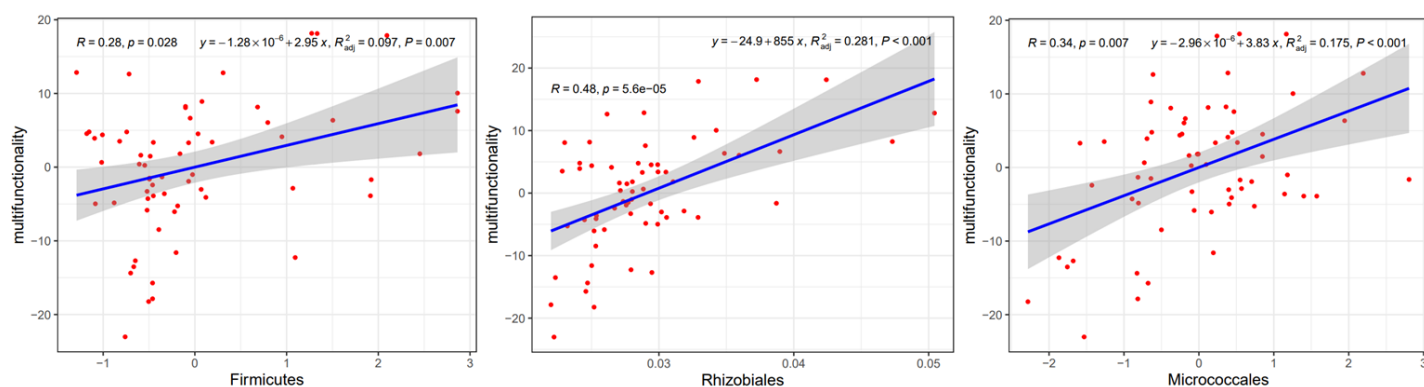

**Figure S3** Regression analysis of significantly different species in bacteria and soil multifunctionality.

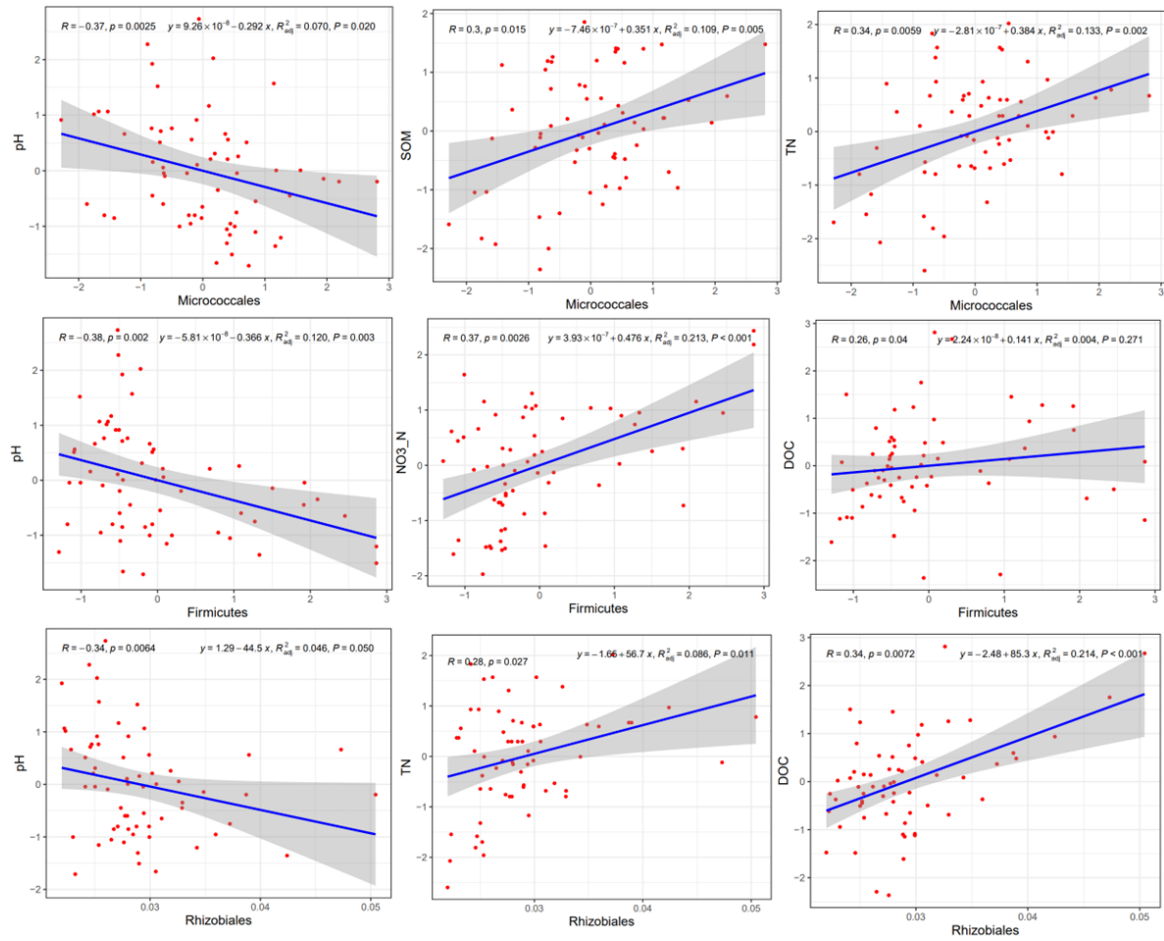

**Figure S4** Regression analysis of significantly different species in bacteria and environmental factors.

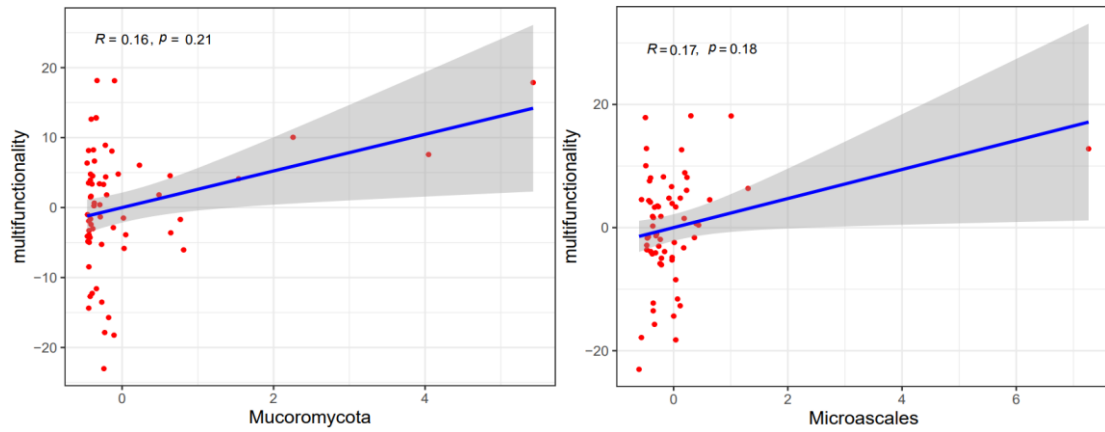

**Figure S5** Regression analysis of different fungal species and soil multifunctionality in SV and CV treatments

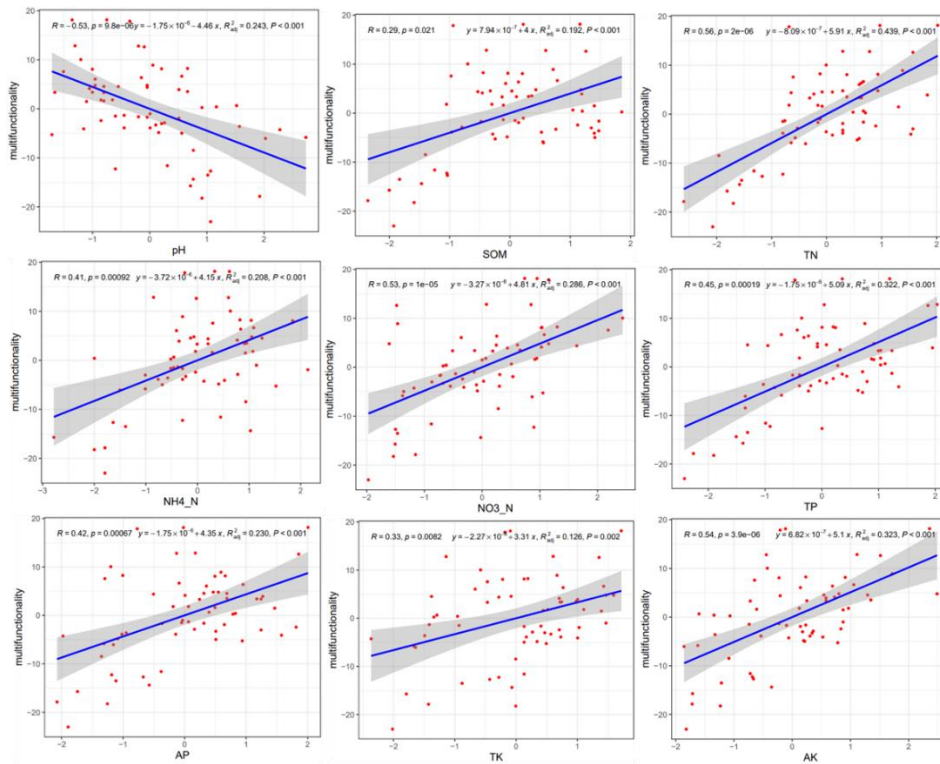

**Figure S6** Regression analysis of environmental factors and soil multifunctionality

**Table S1** Two-way ANOVA of sampling date, green manure treatment, and their interaction on rhizosphere soil microbial diversity.

|                   | Dependent variable | Df | Bacterial |        | Fungal |          |
|-------------------|--------------------|----|-----------|--------|--------|----------|
|                   |                    |    | F         | P      | F      | P        |
| Sampling date (S) | Shannon            | 2  | 0.536     | 0.589  | 1.045  | 0.36     |
|                   | ACE                | 2  | 1.679     | 0.199  | 7.159  | 0.002**  |
| Treatment (T)     | Shannon            | 6  | 1.615     | 0.167  | 1.195  | 0.328    |
|                   | ACE                | 6  | 0.855     | 0.536  | 7.092  | 0.001*** |
| S * T             | Shannon            | 12 | 2.315     | 0.022* | 1.152  | 0.348    |
|                   | ACE                | 12 | 2.216     | 0.029* | 0.784  | 0.664    |

Bacterial:  $R^2_{\text{shannon}}=0.479$   $R^2_{\text{ACE}}=0.455$ . Fungal:  $R^2_{\text{shannon}}=0.355$   $R^2_{\text{ACE}}=0.612$

\*  $P < 0.05$  \*\*  $P < 0.01$ ; \*\*\*  $P < 0.001$

**Table S2.** Two-way ANOVA of sampling date, green manure treatment, and their interaction on flue-cured tobacco soil multifunctionality

| Dependent variable | Df | F     | P     |
|--------------------|----|-------|-------|
| Sampling date (S)  | 2  | 2.293 | 0.113 |

|                                                   |                         |    |        |          |
|---------------------------------------------------|-------------------------|----|--------|----------|
| Treatment (T)                                     | Soil multifunctionality | 6  | 23.905 | 0.001*** |
| S* T                                              |                         | 12 | 3.577  | 0.001**  |
| R <sup>2</sup> =0.820; ** P < 0.01; *** P < 0.001 |                         |    |        |          |

**Table S3** Taxonomic composition of key ecological modules

| ASV                   | Abundance | Type  | Genus                                | Phylum           | Module |
|-----------------------|-----------|-------|--------------------------------------|------------------|--------|
| <b>fungi_ASV_4550</b> | 0.03983   | fungi | Fusarium                             | Ascomycota       | 2      |
| <b>fungi_ASV_5732</b> | 0.029781  | fungi | Plectosphaerella                     | Ascomycota       | 2      |
| fungi_ASV_3339        | 0.015299  | fungi | Penicillium                          | Ascomycota       | 2      |
| bac_ASV_95240         | 0.005666  | bac   | Sphingobium                          | Proteobacteria   | 2      |
| fungi_ASV_899         | 0.003349  | fungi | Fusarium                             | Ascomycota       | 2      |
| fungi_ASV_8750        | 0.002799  | fungi | Staphylotrichum                      | Ascomycota       | 2      |
| bac_ASV_84909         | 0.002676  | bac   | g_unclassified_f_Intrasporangiaceae  | Actinobacteria   | 2      |
| bac_ASV_109816        | 0.002212  | bac   | g_unclassified_o_Azospirillales      | Proteobacteria   | 2      |
| fungi_ASV_1327        | 0.002065  | fungi | g_unclassified_o_Eurotiales          | Ascomycota       | 2      |
| bac_ASV_60856         | 0.001969  | bac   | Rokubacteriales                      | Rokubacteria     | 2      |
| bac_ASV_61744         | 0.0019    | bac   | Phycococcus                          | Actinobacteria   | 2      |
| bac_ASV_65416         | 0.001797  | bac   | g_unclassified_f_Intrasporangiaceae  | Actinobacteria   | 2      |
| bac_ASV_81152         | 0.001716  | bac   | g_unclassified_f_Gemmatimonadaceae   | Gemmatimonadetes | 2      |
| bac_ASV_37166         | 0.001667  | bac   | g_unclassified_f_Gemmatimonadaceae   | Gemmatimonadetes | 2      |
| bac_ASV_43339         | 0.001549  | bac   | Subgroup_6                           | Acidobacteria    | 2      |
| bac_ASV_31257         | 0.001533  | bac   | RB41                                 | Acidobacteria    | 2      |
| bac_ASV_14847         | 0.001449  | bac   | Rhodanobacter                        | Proteobacteria   | 2      |
| bac_ASV_110881        | 0.001439  | bac   | Subgroup_6                           | Acidobacteria    | 2      |
| bac_ASV_90271         | 0.001435  | bac   | bacteriap25                          | Proteobacteria   | 2      |
| bac_ASV_26988         | 0.001349  | bac   | g_unclassified_f_Gemmatimonadaceae   | Gemmatimonadetes | 2      |
| bac_ASV_99421         | 0.001311  | bac   | MB_A2_108                            | Actinobacteria   | 2      |
| bac_ASV_43507         | 0.001306  | bac   | g_unclassified_f_Gemmatimonadaceae   | Gemmatimonadetes | 2      |
| bac_ASV_110025        | 0.001232  | bac   | g_unclassified_f_Gemmatimonadaceae   | Gemmatimonadetes | 2      |
| <b>fungi_ASV_319</b>  | 0.001077  | fungi | Verticillium                         | Ascomycota       | 2      |
| bac_ASV_34763         | 0.001068  | bac   | g_unclassified_f_Gemmatimonadaceae   | Gemmatimonadetes | 2      |
| bac_ASV_43917         | 0.001067  | bac   | mle1_7                               | Proteobacteria   | 2      |
| bac_ASV_43987         | 0.001067  | bac   | Sphingobium                          | Proteobacteria   | 2      |
| bac_ASV_70065         | 0.001025  | bac   | g_unclassified_f_Gemmatimonadaceae   | Gemmatimonadetes | 2      |
| bac_ASV_65171         | 0.000997  | bac   | TK10                                 | Chloroflexi      | 2      |
| bac_ASV_83960         | 0.000983  | bac   | MB_A2_108                            | Actinobacteria   | 2      |
| bac_ASV_68900         | 0.000973  | bac   | Opitutus                             | Verrucomicrobia  | 2      |
| bac_ASV_50022         | 0.000945  | bac   | Subgroup_6                           | Acidobacteria    | 2      |
| bac_ASV_77978         | 0.000926  | bac   | g_unclassified_o_Microtrichales      | Actinobacteria   | 2      |
| bac_ASV_141           | 0.0009    | bac   | g_unclassified_f_Illumatobacteraceae | Actinobacteria   | 2      |
| bac_ASV_86790         | 0.00089   | bac   | Ramlibacter                          | Proteobacteria   | 2      |
| bac_ASV_82069         | 0.000884  | bac   | Gemmatimonas                         | Gemmatimonadetes | 2      |
| bac_ASV_19526         | 0.000868  | bac   | S0134_terrestrial_group              | Gemmatimonadetes | 2      |
| bac_ASV_82654         | 0.000831  | bac   | Blastococcus                         | Actinobacteria   | 2      |
| bac_ASV_12046         | 0.0008    | bac   | Geodermatophilus                     | Actinobacteria   | 2      |
| bac_ASV_18157         | 0.000798  | bac   | Subgroup_6                           | Acidobacteria    | 2      |
| bac_ASV_26325         | 0.00078   | bac   | Agromyces                            | Actinobacteria   | 2      |
| bac_ASV_43990         | 0.000731  | bac   | MND1                                 | Proteobacteria   | 2      |
| bac_ASV_17299         | 0.000724  | bac   | g_unclassified_f_Microscillaceae     | Bacteroidetes    | 2      |
| bac_ASV_28798         | 0.000724  | bac   | 67_14                                | Actinobacteria   | 2      |
| bac_ASV_44018         | 0.00072   | bac   | Subgroup_6                           | Acidobacteria    | 2      |
| fungi_ASV_6687        | 0.000713  | fungi | Penicillium                          | Ascomycota       | 2      |
| bac_ASV_104420        | 0.000702  | bac   | g_unclassified_f_Gemmatimonadaceae   | Gemmatimonadetes | 2      |

|                |          |       |                                       |                         |   |
|----------------|----------|-------|---------------------------------------|-------------------------|---|
| bac_ASV_116079 | 0.000702 | bac   | Subgroup_7                            | Acidobacteria           | 2 |
| fungi_ASV_6709 | 0.000687 | fungi | g_unclassified_d__Fungi               | p_unclassified_d__Fungi | 2 |
| bac_ASV_64161  | 0.00068  | bac   | Flavisolibacter                       | Bacteroidetes           | 2 |
| bac_ASV_34930  | 0.000672 | bac   | Agromyces                             | Actinobacteria          | 2 |
| bac_ASV_116355 | 0.000662 | bac   | Methylothera                          | Proteobacteria          | 2 |
| bac_ASV_104996 | 0.000622 | bac   | g_unclassified_f__Ilumatobacteraceae  | Actinobacteria          | 2 |
| bac_ASV_67415  | 0.000621 | bac   | Solirubrobacter                       | Actinobacteria          | 2 |
| bac_ASV_108883 | 0.00062  | bac   | Blastococcus                          | Actinobacteria          | 2 |
| bac_ASV_34024  | 0.000614 | bac   | Subgroup_6                            | Acidobacteria           | 2 |
| bac_ASV_22569  | 0.000603 | bac   | AKAU4049                              | Gemmatimonadetes        | 2 |
| bac_ASV_20311  | 0.000598 | bac   | Subgroup_22                           | Acidobacteria           | 2 |
| bac_ASV_75100  | 0.000593 | bac   | g_unclassified_f__Gemmatimonadaceae   | Gemmatimonadetes        | 2 |
| bac_ASV_38457  | 0.000588 | bac   | g_unclassified_f__Intrasporangiaceae  | Actinobacteria          | 2 |
| bac_ASV_31557  | 0.000558 | bac   | Gemmatimonas                          | Gemmatimonadetes        | 2 |
| bac_ASV_112002 | 0.000542 | bac   | Ilumatobacter                         | Actinobacteria          | 2 |
| bac_ASV_37940  | 0.000529 | bac   | g_unclassified_f__Gemmatimonadaceae   | Gemmatimonadetes        | 2 |
| bac_ASV_26189  | 0.000519 | bac   | RB41                                  | Acidobacteria           | 2 |
| bac_ASV_63116  | 0.000502 | bac   | Subgroup_10                           | Acidobacteria           | 2 |
| bac_ASV_62040  | 0.000489 | bac   | g_unclassified_f__Gemmatimonadaceae   | Gemmatimonadetes        | 2 |
| bac_ASV_87569  | 0.000478 | bac   | Gemmatimonas                          | Gemmatimonadetes        | 2 |
| bac_ASV_68226  | 0.000475 | bac   | g_unclassified_f__Roseiflexaceae      | Chloroflexi             | 2 |
| bac_ASV_54260  | 0.000459 | bac   | Hyphomicrobium                        | Proteobacteria          | 2 |
| bac_ASV_2037   | 0.000458 | bac   | S0134_terrestrial_group               | Gemmatimonadetes        | 2 |
| bac_ASV_65870  | 0.000419 | bac   | Aridibacter                           | Acidobacteria           | 2 |
| bac_ASV_110069 | 0.000418 | bac   | Bryobacter                            | Acidobacteria           | 2 |
| bac_ASV_78281  | 0.000411 | bac   | Subgroup_6                            | Acidobacteria           | 2 |
| bac_ASV_24463  | 0.00041  | bac   | Gemmatirosa                           | Gemmatimonadetes        | 2 |
| bac_ASV_41785  | 0.000408 | bac   | g_unclassified_c__Alphaproteobacteria | Proteobacteria          | 2 |
| bac_ASV_94061  | 0.000408 | bac   | OM190                                 | Planctomycetes          | 2 |
| bac_ASV_76398  | 0.000407 | bac   | Gitt_GS_136                           | Chloroflexi             | 2 |
| bac_ASV_52454  | 0.0004   | bac   | C0119                                 | Chloroflexi             | 2 |
| bac_ASV_71511  | 0.000386 | bac   | g_unclassified_f__Xanthobacteraceae   | Proteobacteria          | 2 |
| bac_ASV_96730  | 0.000386 | bac   | g_unclassified_f__Intrasporangiaceae  | Actinobacteria          | 2 |
| bac_ASV_4049   | 0.000377 | bac   | NB1_j                                 | Proteobacteria          | 2 |
| bac_ASV_68686  | 0.000372 | bac   | Ramlibacter                           | Proteobacteria          | 2 |
| bac_ASV_80614  | 0.000368 | bac   | Sphingobium                           | Proteobacteria          | 2 |
| bac_ASV_25966  | 0.000366 | bac   | Chthonomonadales                      | Armatimonadetes         | 2 |
| bac_ASV_65554  | 0.000353 | bac   | Gemmatimonas                          | Gemmatimonadetes        | 2 |
| bac_ASV_33058  | 0.00035  | bac   | g_unclassified_f__Gemmatimonadaceae   | Gemmatimonadetes        | 2 |
| bac_ASV_58043  | 0.000349 | bac   | g_unclassified_f__Opitutaceae         | Verrucomicrobia         | 2 |
| bac_ASV_6581   | 0.000347 | bac   | Gaiella                               | Actinobacteria          | 2 |
| bac_ASV_7573   | 0.000347 | bac   | g_unclassified_f__Intrasporangiaceae  | Actinobacteria          | 2 |
| bac_ASV_59574  | 0.000346 | bac   | Subgroup_6                            | Acidobacteria           | 2 |
| bac_ASV_38200  | 0.000345 | bac   | Subgroup_6                            | Acidobacteria           | 2 |
| bac_ASV_93850  | 0.00034  | bac   | Subgroup_6                            | Acidobacteria           | 2 |
| fungi_ASV_1252 | 0.00033  | fungi | g_unclassified_d__Fungi               | p_unclassified_d__Fungi | 2 |
| bac_ASV_38000  | 0.000317 | bac   | JG30_KF_CM45                          | Chloroflexi             | 2 |
| bac_ASV_42866  | 0.000314 | bac   | g_unclassified_f__Gemmatimonadaceae   | Gemmatimonadetes        | 2 |
| bac_ASV_113495 | 0.000301 | bac   | Stenotrophobacter                     | Acidobacteria           | 2 |

|                       |          |       |                                       |                         |   |
|-----------------------|----------|-------|---------------------------------------|-------------------------|---|
| bac_ASV_67391         | 0.000294 | bac   | 67_14                                 | Actinobacteria          | 2 |
| bac_ASV_77010         | 0.00028  | bac   | Rokubacteriales                       | Rokubacteria            | 2 |
| bac_ASV_72653         | 0.000277 | bac   | g_unclassified_o__Gaiellales          | Actinobacteria          | 2 |
| bac_ASV_43040         | 0.000251 | bac   | g_unclassified_f__Intrasporangiaceae  | Actinobacteria          | 2 |
| bac_ASV_2969          | 0.000247 | bac   | NB1_j                                 | Proteobacteria          | 2 |
| bac_ASV_98127         | 0.000237 | bac   | C0119                                 | Chloroflexi             | 2 |
| bac_ASV_70960         | 0.000235 | bac   | RB41                                  | Acidobacteria           | 2 |
| bac_ASV_83395         | 0.000228 | bac   | NB1_j                                 | Proteobacteria          | 2 |
| bac_ASV_60610         | 0.000185 | bac   | g_unclassified_c__Alphaproteobacteria | Proteobacteria          | 2 |
| bac_ASV_16973         | 0.000184 | bac   | AKYG587                               | Planctomycetes          | 2 |
| bac_ASV_1442          | 0.000172 | bac   | g_unclassified_f__Gemmatimonadaceae   | Gemmatimonadetes        | 2 |
| bac_ASV_62792         | 0.000124 | bac   | g_unclassified_f__Chitinophagaceae    | Bacteroidetes           | 2 |
| bac_ASV_83953         | 0.000122 | bac   | Gaiella                               | Actinobacteria          | 2 |
| fungi_ASV_2220        | 0.012798 | fungi | Talaromyces                           | Ascomycota              | 3 |
| bac_ASV_116505        | 0.006283 | bac   | g_unclassified_f__Intrasporangiaceae  | Actinobacteria          | 3 |
| <b>fungi_ASV_2412</b> | 0.005528 | fungi | Chaetomium                            | Ascomycota              | 3 |
| bac_ASV_75831         | 0.00442  | bac   | Gaiella                               | Actinobacteria          | 3 |
| bac_ASV_18811         | 0.003859 | bac   | g_unclassified_f__Sporichthyaceae     | Actinobacteria          | 3 |
| bac_ASV_55972         | 0.00354  | bac   | MND1                                  | Proteobacteria          | 3 |
| <b>fungi_ASV_4781</b> | 0.003444 | fungi | g_unclassified_o__Sordariales         | Ascomycota              | 3 |
| fungi_ASV_6061        | 0.00233  | fungi | g_unclassified_f__Sporormiaceae       | Ascomycota              | 3 |
| fungi_ASV_5260        | 0.002217 | fungi | g_unclassified_f__Nectriaceae         | Ascomycota              | 3 |
| fungi_ASV_9401        | 0.002197 | fungi | g_unclassified_o__Hypocreales         | Ascomycota              | 3 |
| bac_ASV_107208        | 0.002103 | bac   | g_unclassified_f__Gemmatimonadaceae   | Gemmatimonadetes        | 3 |
| fungi_ASV_8070        | 0.001831 | fungi | g_unclassified_d__Fungi               | p_unclassified_d__Fungi | 3 |
| bac_ASV_57233         | 0.001511 | bac   | Arenimonas                            | Proteobacteria          | 3 |
| fungi_ASV_3551        | 0.001366 | fungi | g_unclassified_c__Sordariomycetes     | Ascomycota              | 3 |
| bac_ASV_111908        | 0.001358 | bac   | g_unclassified_f__Gemmatimonadaceae   | Gemmatimonadetes        | 3 |
| bac_ASV_1912          | 0.001345 | bac   | Subgroup_6                            | Acidobacteria           | 3 |
| bac_ASV_72243         | 0.001286 | bac   | Marmoricola                           | Actinobacteria          | 3 |
| bac_ASV_23271         | 0.001277 | bac   | g_unclassified_f__Chitinophagaceae    | Bacteroidetes           | 3 |
| bac_ASV_14856         | 0.001249 | bac   | RB41                                  | Acidobacteria           | 3 |
| bac_ASV_94078         | 0.001121 | bac   | Gaiella                               | Actinobacteria          | 3 |
| bac_ASV_88010         | 0.001079 | bac   | Gaiella                               | Actinobacteria          | 3 |
| bac_ASV_78313         | 0.001059 | bac   | g_unclassified_o__Gaiellales          | Actinobacteria          | 3 |
| bac_ASV_43006         | 0.001035 | bac   | g_unclassified_f__Gemmatimonadaceae   | Gemmatimonadetes        | 3 |
| bac_ASV_68986         | 0.001031 | bac   | bacteriap25                           | Proteobacteria          | 3 |
| bac_ASV_107859        | 0.001023 | bac   | Subgroup_6                            | Acidobacteria           | 3 |
| bac_ASV_1554          | 0.000988 | bac   | Gemmatimonas                          | Gemmatimonadetes        | 3 |
| bac_ASV_32632         | 0.000977 | bac   | g_unclassified_f__Gemmatimonadaceae   | Gemmatimonadetes        | 3 |
| bac_ASV_88527         | 0.000936 | bac   | g_unclassified_o__Microtrichales      | Actinobacteria          | 3 |
| bac_ASV_106117        | 0.000867 | bac   | Pseudolabrys                          | Proteobacteria          | 3 |
| bac_ASV_48365         | 0.000848 | bac   | Micromonospora                        | Actinobacteria          | 3 |
| bac_ASV_74939         | 0.000843 | bac   | MB_A2_108                             | Actinobacteria          | 3 |
| <b>fungi_ASV_9957</b> | 0.000824 | fungi | Fusarium                              | Ascomycota              | 3 |
| bac_ASV_3858          | 0.000823 | bac   | UTBCD1                                | Bacteroidetes           | 3 |
| bac_ASV_116212        | 0.000774 | bac   | g_unclassified_f__Rhodanobacteraceae  | Proteobacteria          | 3 |
| bac_ASV_57923         | 0.000766 | bac   | g_unclassified_o__Gaiellales          | Actinobacteria          | 3 |
| bac_ASV_1407          | 0.000762 | bac   | Solirubrobacter                       | Actinobacteria          | 3 |



|                       |          |       |                                       |                  |   |
|-----------------------|----------|-------|---------------------------------------|------------------|---|
| bac_ASV_97047         | 0.000744 | bac   | Gemmatimonas                          | Gemmatimonadetes | 3 |
| bac_ASV_83255         | 0.000702 | bac   | OLB14                                 | Chloroflexi      | 3 |
| bac_ASV_5854          | 0.000699 | bac   | g_unclassified_f__Gemmatimonadaceae   | Gemmatimonadetes | 3 |
| <b>fungi_ASV_2597</b> | 0.000672 | fungi | Penicillium                           | Ascomycota       | 3 |
| bac_ASV_98389         | 0.00067  | bac   | Subgroup_6                            | Acidobacteria    | 3 |
| bac_ASV_109318        | 0.000637 | bac   | Gaiella                               | Actinobacteria   | 3 |
| bac_ASV_32505         | 0.000635 | bac   | Subgroup_22                           | Acidobacteria    | 3 |
| bac_ASV_110408        | 0.000616 | bac   | JG30_KF_CM66                          | Chloroflexi      | 3 |
| bac_ASV_40491         | 0.000612 | bac   | Nitrospira                            | Nitrospirae      | 3 |
| bac_ASV_105696        | 0.000598 | bac   | g_unclassified_f__Xanthobacteraceae   | Proteobacteria   | 3 |
| bac_ASV_83795         | 0.000595 | bac   | Subgroup_6                            | Acidobacteria    | 3 |
| bac_ASV_92898         | 0.000583 | bac   | OLB14                                 | Chloroflexi      | 3 |
| bac_ASV_116223        | 0.000569 | bac   | MB_A2_108                             | Actinobacteria   | 3 |
| bac_ASV_78343         | 0.000567 | bac   | 67_14                                 | Actinobacteria   | 3 |
| bac_ASV_5738          | 0.000565 | bac   | g_unclassified_f__Roseiflexaceae      | Chloroflexi      | 3 |
| bac_ASV_88935         | 0.000562 | bac   | Adhaeribacter                         | Bacteroidetes    | 3 |
| bac_ASV_38771         | 0.000548 | bac   | g_unclassified_f__Chitinophagaceae    | Bacteroidetes    | 3 |
| bac_ASV_11052         | 0.000529 | bac   | C0119                                 | Chloroflexi      | 3 |
| bac_ASV_90790         | 0.000523 | bac   | SC_I_84                               | Proteobacteria   | 3 |
| bac_ASV_33724         | 0.000499 | bac   | SC_I_84                               | Proteobacteria   | 3 |
| bac_ASV_64907         | 0.000496 | bac   | g_unclassified_f__Gemmatimonadaceae   | Gemmatimonadetes | 3 |
| fungi_ASV_1222        | 0.000494 | fungi | Aspergillus                           | Ascomycota       | 3 |
| bac_ASV_115211        | 0.000485 | bac   | Rokubacteriales                       | Rokubacteria     | 3 |
| bac_ASV_100968        | 0.000483 | bac   | 67_14                                 | Actinobacteria   | 3 |
| bac_ASV_85884         | 0.000479 | bac   | 67_14                                 | Actinobacteria   | 3 |
| bac_ASV_69862         | 0.000434 | bac   | KD4_96                                | Chloroflexi      | 3 |
| bac_ASV_20476         | 0.000419 | bac   | 67_14                                 | Actinobacteria   | 3 |
| bac_ASV_376           | 0.000411 | bac   | Solirubrobacter                       | Actinobacteria   | 3 |
| bac_ASV_39351         | 0.00041  | bac   | Solirubrobacter                       | Actinobacteria   | 3 |
| bac_ASV_48297         | 0.000404 | bac   | Bacillus                              | Firmicutes       | 3 |
| bac_ASV_116333        | 0.000403 | bac   | Phenylobacterium                      | Proteobacteria   | 3 |
| bac_ASV_21358         | 0.00039  | bac   | Nocardioides                          | Actinobacteria   | 3 |
| bac_ASV_84332         | 0.000384 | bac   | g_unclassified_f__Chitinophagaceae    | Bacteroidetes    | 3 |
| bac_ASV_10918         | 0.000375 | bac   | g_unclassified_f__Roseiflexaceae      | Chloroflexi      | 3 |
| bac_ASV_15298         | 0.000373 | bac   | JG30_KF_CM66                          | Chloroflexi      | 3 |
| bac_ASV_41412         | 0.000365 | bac   | Gemmatimonas                          | Gemmatimonadetes | 3 |
| bac_ASV_25039         | 0.000363 | bac   | 67_14                                 | Actinobacteria   | 3 |
| bac_ASV_99637         | 0.000348 | bac   | Nordella                              | Proteobacteria   | 3 |
| bac_ASV_104902        | 0.000341 | bac   | g_unclassified_o__Gaiellales          | Actinobacteria   | 3 |
| bac_ASV_75976         | 0.000318 | bac   | g_unclassified_o__Microtrichales      | Actinobacteria   | 3 |
| bac_ASV_25222         | 0.000315 | bac   | g_unclassified_f__Steroidobacteraceae | Proteobacteria   | 3 |
| bac_ASV_59581         | 0.000315 | bac   | 67_14                                 | Actinobacteria   | 3 |
| bac_ASV_108889        | 0.000314 | bac   | g_unclassified_f__Roseiflexaceae      | Chloroflexi      | 3 |
| bac_ASV_70201         | 0.000298 | bac   | Streptomyces                          | Actinobacteria   | 3 |
| bac_ASV_116612        | 0.000289 | bac   | TRA3_20                               | Proteobacteria   | 3 |
| fungi_ASV_9364        | 0.000288 | fungi | Cystofilobasidium                     | Basidiomycota    | 3 |
| bac_ASV_74668         | 0.00028  | bac   | Nitrospira                            | Nitrospirae      | 3 |
| bac_ASV_48494         | 0.000274 | bac   | JG30_KF_CM66                          | Chloroflexi      | 3 |
| bac_ASV_9345          | 0.000272 | bac   | g_unclassified_c__Thermoleophilia     | Actinobacteria   | 3 |

|                |          |     |                                      |                  |   |
|----------------|----------|-----|--------------------------------------|------------------|---|
| bac_ASV_13783  | 0.000261 | bac | g_unclassified_f__Intrasporangiaceae | Actinobacteria   | 3 |
| bac_ASV_27652  | 0.000254 | bac | RBG_13_54_9                          | Chloroflexi      | 3 |
| bac_ASV_109335 | 0.000253 | bac | g_unclassified_o__Gaiellales         | Actinobacteria   | 3 |
| bac_ASV_27972  | 0.000245 | bac | g_unclassified_f__Roseiflexaceae     | Chloroflexi      | 3 |
| bac_ASV_57822  | 0.000222 | bac | g_unclassified_o__Actinomarinales    | Actinobacteria   | 3 |
| bac_ASV_14908  | 0.000217 | bac | Rokubacteriales                      | Rokubacteria     | 3 |
| bac_ASV_77254  | 0.000199 | bac | Subgroup_6                           | Acidobacteria    | 3 |
| bac_ASV_93735  | 0.000185 | bac | Subgroup_6                           | Acidobacteria    | 3 |
| bac_ASV_105910 | 0.000167 | bac | Gaiella                              | Actinobacteria   | 3 |
| bac_ASV_82788  | 0.000143 | bac | OPB56                                | Bacteroidetes    | 3 |
| bac_ASV_40789  | 0.000099 | bac | g_unclassified_f__Gemmatimonadaceae  | Gemmatimonadetes | 3 |
| bac_ASV_37566  | 0.000095 | bac | Ramlibacter                          | Proteobacteria   | 3 |

---

Note: The relative abundance of ASVs in modules is arranged in descending order.

**Table S4** Functional prediction information of fungal nodes and other negative correlation nodes in main ecological modules

| Source       | Module | Genus                | Phylum     | Trophic Mode                              | Guild                                                                                                    | Target        | Module | Genus            | Phylum         | Function_type                   | Function_group |
|--------------|--------|----------------------|------------|-------------------------------------------|----------------------------------------------------------------------------------------------------------|---------------|--------|------------------|----------------|---------------------------------|----------------|
| ASV_45<br>50 | 2      | Fusarium             | Ascomycota | Pathotroph–<br>saprotroph–<br>symbiotroph | Animal Pathogen-<br>Endophyte-Lichen<br>Parasite-Plant<br>Pathogen-Soil<br>Saprotroph-Wood<br>Saprotroph | ASV_39<br>013 | 0      | Lysobacter       | Proteobacteria | chitinolysis                    | C-cycle        |
| ASV_57<br>32 | 2      | Plectosph<br>aerella | Ascomycota | Pathotroph                                | Plant Pathogen                                                                                           | ASV_55<br>972 | 3      | MND1             | Proteobacteria | anaerobic_chemo<br>heterotrophy | Energy source  |
| ASV_22<br>20 | 3      | Talaromy<br>ces      | Ascomycota | Saprotroph                                | Undefined<br>Saprotroph                                                                                  | ASV_57<br>233 | 3      | Arenimonas       | Proteobacteria | aerobic_ammonia<br>_oxidation   | N-cycle        |
| ASV_22<br>20 | 3      | Talaromy<br>ces      | Ascomycota |                                           |                                                                                                          | ASV_88<br>935 | 3      | Adhaeribacter    | Bacteroidetes  | nitrification                   | N-cycle        |
| ASV_99<br>57 | 3      | Fusarium             | Ascomycota | Pathotroph–<br>saprotroph–<br>symbiotroph | Animal Pathogen-<br>Endophyte-Lichen<br>Parasite-Plant<br>Pathogen-Soil<br>Saprotroph-Wood<br>Saprotroph | ASV_27<br>891 | 0      | Sphingomona<br>s | Proteobacteria | aerobic_chemohet<br>erotrophy   | Energy source  |
| ASV_99<br>57 | 3      | Fusarium             | Ascomycota |                                           |                                                                                                          | ASV_80<br>436 | 0      | Lysobacter       | Proteobacteria | aerobic_chemohet<br>erotrophy   | Energy source  |
| ASV_25<br>97 | 3      | Penicilliu<br>m      | Ascomycota | Saprotroph                                | Undefined<br>Saprotroph                                                                                  | ASV_57<br>233 | 3      | Arenimonas       | Proteobacteria | anaerobic_chemo<br>heterotrophy | Energy source  |
| ASV_25<br>97 | 3      | Penicilliu<br>m      | Ascomycota |                                           |                                                                                                          | ASV_85<br>322 | 4      | MM2              | Proteobacteria | chitinolysis                    | C-cycle        |
|              |        |                      |            |                                           |                                                                                                          |               |        |                  |                | aerobic_chemohet<br>erotrophy   | Energy source  |
|              |        |                      |            |                                           |                                                                                                          |               |        |                  |                | anaerobic_chemo<br>heterotrophy | Energy source  |

**Table S5** Bacterial and fungal interactions within and between co-occurrence clusters across all study samples

| Module | Edge | Positive edge | Negative edge |
|--------|------|---------------|---------------|
| 2      | 443  | 346           | 97            |
| 3      | 824  | 605           | 219           |

  

|                      | Total | Positive Link | Negative Link |
|----------------------|-------|---------------|---------------|
| Module 1 to Module 2 | 244   | 150           | 94            |
| Module 1 to Module 3 | 681   | 510           | 171           |
| Module 1 to Module 4 | 842   | 568           | 274           |
| Module 2 to Module 3 | 63    | 56            | 7             |
| Module 2 to Module 4 | 128   | 94            | 34            |
| Module 3 to Module 4 | 699   | 465           | 234           |
